 

Loading...
